# Supplementary material
Source: MDPI journal article supplement (https://www.mdpi.com/2073-4352/8/3/110)
Supplement: s1 [file s1]

1. The intermediate derivation process of Eq. (4)

|  | **(4)** |
| --- | --- |

The improved equation based on error induced by minor impurity phase of internal standard can be derived as following:

|  |  | |
| --- | --- | --- |
|  |  | |
|  | |  |

where Sa_C and Sa_A stand for crystalline and amorphous phase in original sample (Sa), respectively; St_C and St_A separately represent crystalline and amorphous or non-quantified crystalline phases (ACn) in added standard (St); Sa_C, Sa_A, St_C and St_A constitute the mixture sample to be quantified. And based upon the mathematic relationship between Rietveld quantitative result and actual weight percentage, there are some equations listed below:

|  |  | |
| --- | --- | --- |
|  |  | |
|  | |  |
|  | |  |

where RSa_C and RSt_C stand for Rietveld refined weight fractions of crystalline phases in original sample and internal standard, respectively. Using the equations above, the improved equation for WAmor can be proposed as Eq. (4), where 'α' is defined as the crystallinity in that internal standard.

|  |  |
| --- | --- |

2. The intermediate derivation process of Eq. (9) and (10)

|  | **(9)** |
| --- | --- |
|  | **(10)** |

The equations of absolute and relative errors (△AE, △RE) can be derived as following:

|  |  |
| --- | --- |

Where subscripts of 'Y' or 'N' stands for considering or ignoring the minor standard phase present in sample (SPS). According to the mathematic relationship between Rietveld result and actual weight percentage, in the above equation can be expressed as following:

|  |  |
| --- | --- |

Where WC and WX represent the weight percentage of all the crystalline phases and standard phases in mixed sample, respectively.

|  |  |
| --- | --- |
|  |  |

Where W†X and W†Amor represent the weight fraction of 'coincident standard phases' and amorphous phase in original sample, respectively. Combined the equations above, absolute error (ΔAE) can be proposed as following:

|  |
| --- |

To simplified 'ΔAE' above, Wst/100-Wst, W†Amor and W† Xare set as x, y and z, respectively. And the absolute error (ΔAE) can be finally converted as Eq. (9). Moreover, the relative error (ΔAE) can be proposed as Eq. (10).

|  |  |
| --- | --- |
|  |  |

3. The intermediate derivation process of Eq. (11)

|  | **(11)** |
| --- | --- |

The improved equation based on error induced by minor standard phase present in sample can be derived as following:

|  |  | |
| --- | --- | --- |
|  |  | |
|  | |  |

Where RSt and R†X stand for the Rietveld quantitative result of internal standard and SPS phase. Using the equations above, the mathematic relationship between amorphous phase quantitation and dosage of internal standard can be expressed as following. And the corrected equation for amorphous phase quantitation can be finally proposed as Eq.(11).

|  |  |
| --- | --- |
|  |  |
